# Supplementary material for: Plastome Characterization and Phylogenomics of East Asian Beeches with a Special Emphasis on Fagus multinervis on Ulleung Island, Korea
Source: Genes (Basel). 2020 Nov 12;11(11):1338. doi: 10.3390/genes11111338 (PMC7697516; doi:10.3390/genes11111338)
Supplement: Supplementary file 1 [file genes-11-01338-s001.xlsx]

## Sheet: supplementaryS1
Supplementary Table S1. The predicted RNA editing sites in the complete chloroplast genome of the five Fagus species in eastern Asia.
Fagus crenata (MT762292)					Fagus engleriana (NC036929)					Fagus japonica 7-1 (MT762294)					Fagus japonica 10-1 (MT762295)					Fagus multinervis (MT762296)
Gene	Nt Pos	AA Pos	Effect	Score	Gene	Nt Pos	AA Pos	Effect	Score	Gene	Nt Pos	AA Pos	Effect	Score	Gene	Nt Pos	AA Pos	Effect	Score	Gene	Nt Pos	AA Pos	Effect	Score
accD	247	83	CCT (P) => TCT (S)	1	accD	247	83	CCT (P) => TCT (S)	1	accD	247	83	CCT (P) => TCT (S)	1	accD	29	10	TCG (S) => TTG (L)	0.8	accD	274	92	CCT (P) => TCT (S)	1
	799	267	CAT (H) => TAT (Y)	0.8		799	267	CAT (H) => TAT (Y)	0.8		799	267	CAT (H) => TAT (Y)	0.8							826	276	CAT (H) => TAT (Y)	0.8
	839	280	TCG (S) => TTG (L)	0.8		839	280	TCG (S) => TTG (L)	0.8		839	280	TCG (S) => TTG (L)	0.8							866	289	TCG (S) => TTG (L)	0.8
atpA	791	264	CCT (P) => CTT (L)	1	atpA	791	264	CCT (P) => CTT (L)	1	atpA	791	264	CCT (P) => CTT (L)	1	atpA	791	264	CCT (P) => CTT (L)	1	atpA	791	264	CCT (P) => CTT (L)	1
	914	305	TCA (S) => TTA (L)	1		914	305	TCA (S) => TTA (L)	1		914	305	TCA (S) => TTA (L)	1		914	305	TCA (S) => TTA (L)	1		914	305	TCA (S) => TTA (L)	1
	1148	383	TCA (S) => TTA (L)	1		1148	383	TCA (S) => TTA (L)	1		1148	383	TCA (S) => TTA (L)	1		1148	383	TCA (S) => TTA (L)	1		1148	383	TCA (S) => TTA (L)	1
atpF	92	31	CCA (P) => CTA (L)	0.86	atpF	92	31	CCA (P) => CTA (L)	0.86	atpF	92	31	CCA (P) => CTA (L)	0.86	atpF	92	31	CCA (P) => CTA (L)	0.86	atpF	92	31	CCA (P) => CTA (L)	0.86
	224	75	ACC (T) => ATC (I)	0.86							224	75	ACC (T) => ATC (I)	0.86		224	75	ACC (T) => ATC (I)	0.86		224	75	ACC (T) => ATC (I)	0.86
atpI	653	218	TCA (S) => TTA (L)	1	atpI	653	218	TCA (S) => TTA (L)	1	atpI	653	218	TCA (S) => TTA (L)	1	atpI	653	218	TCA (S) => TTA (L)	1	atpI	653	218	TCA (S) => TTA (L)	1
ccsA	49	17	CTT (L) => TTT (F)	1	ccsA	43	15	CTT (L) => TTT (F)	1	ccsA	43	15	CTT (L) => TTT (F)	1	ccsA	49	17	CTT (L) => TTT (F)	1	ccsA	43	15	CTT (L) => TTT (F)	1
clpP	530	177	GCT (A) => GTT (V)	1	clpP	530	177	GCT (A) => GTT (V)	1	clpP	530	177	GCT (A) => GTT (V)	1	clpP	530	177	GCT (A) => GTT (V)	1	clpP	530	177	GCT (A) => GTT (V)	1
	559	187	CAT (H) => TAT (Y)	1		559	187	CAT (H) => TAT (Y)	1		559	187	CAT (H) => TAT (Y)	1		559	187	CAT (H) => TAT (Y)	1		559	187	CAT (H) => TAT (Y)	1
matK	268	90	CAT (H) => TAT (Y)	1	matK	268	90	CAT (H) => TAT (Y)	1	matK	268	90	CAT (H) => TAT (Y)	1	matK	268	90	CAT (H) => TAT (Y)	1	matK	268	90	CAT (H) => TAT (Y)	1
	640	214	CAT (H) => TAT (Y)	1		640	214	CAT (H) => TAT (Y)	1		640	214	CAT (H) => TAT (Y)	1		640	214	CAT (H) => TAT (Y)	1		640	214	CAT (H) => TAT (Y)	1
	1174	392	CGG (R) => TGG (W)	1		1174	392	CGG (R) => TGG (W)	1		1174	392	CGG (R) => TGG (W)	1		1174	392	CGG (R) => TGG (W)	1		1174	392	CGG (R) => TGG (W)	1
	1340	447	GCA (A) => GTA (V)	0.86		1340	447	GCA (A) => GTA (V)	0.86		1340	447	GCA (A) => GTA (V)	0.86		1340	447	GCA (A) => GTA (V)	0.86		1340	447	GCA (A) => GTA (V)	0.86
ndhA	341	114	TCA (S) => TTA (L)	1	ndhA	341	114	TCA (S) => TTA (L)	1	ndhA	341	114	TCA (S) => TTA (L)	1	ndhA	341	114	TCA (S) => TTA (L)	1	ndhA	341	114	TCA (S) => TTA (L)	1
ndhB	149	50	TCA (S) => TTA (L)	1	ndhB	149	50	TCA (S) => TTA (L)	1	ndhB	149	50	TCA (S) => TTA (L)	1	ndhB	149	50	TCA (S) => TTA (L)	1	ndhB	149	50	TCA (S) => TTA (L)	1
	467	156	CCA (P) => CTA (L)	1		467	156	CCA (P) => CTA (L)	1		467	156	CCA (P) => CTA (L)	1		467	156	CCA (P) => CTA (L)	1		467	156	CCA (P) => CTA (L)	1
	586	196	CAT (H) => TAT (Y)	1		586	196	CAT (H) => TAT (Y)	1		586	196	CAT (H) => TAT (Y)	1		586	196	CAT (H) => TAT (Y)	1		586	196	CAT (H) => TAT (Y)	1
	611	204	TCA (S) => TTA (L)	0.8		611	204	TCA (S) => TTA (L)	0.8		611	204	TCA (S) => TTA (L)	0.8		611	204	TCA (S) => TTA (L)	0.8		611	204	TCA (S) => TTA (L)	0.8
	737	246	CCA (P) => CTA (L)	1		737	246	CCA (P) => CTA (L)	1		737	246	CCA (P) => CTA (L)	1		737	246	CCA (P) => CTA (L)	1		737	246	CCA (P) => CTA (L)	1
	746	249	TCT (S) => TTT (F)	1		746	249	TCT (S) => TTT (F)	1		746	249	TCT (S) => TTT (F)	1		746	249	TCT (S) => TTT (F)	1		746	249	TCT (S) => TTT (F)	1
	830	277	TCA (S) => TTA (L)	1		830	277	TCA (S) => TTA (L)	1		830	277	TCA (S) => TTA (L)	1		830	277	TCA (S) => TTA (L)	1		830	277	TCA (S) => TTA (L)	1
	836	279	TCA (S) => TTA (L)	1		836	279	TCA (S) => TTA (L)	1		836	279	TCA (S) => TTA (L)	1		836	279	TCA (S) => TTA (L)	1		836	279	TCA (S) => TTA (L)	1
	1255	419	CAT (H) => TAT (Y)	1		1255	419	CAT (H) => TAT (Y)	1		1255	419	CAT (H) => TAT (Y)	1		1255	419	CAT (H) => TAT (Y)	1		1255	419	CAT (H) => TAT (Y)	1
	1481	494	CCA (P) => CTA (L)	1		1481	494	CCA (P) => CTA (L)	1		1481	494	CCA (P) => CTA (L)	1		1481	494	CCA (P) => CTA (L)	1		1481	494	CCA (P) => CTA (L)	1
ndhD	98	33	ACG (T) => ATG (M)	1	ndhD	98	33	ACG (T) => ATG (M)	1	ndhD	125	42	ACG (T) => ATG (M)	1	ndhD	2	1	ACG (T) => ATG (M)	1	ndhD	29	10	ACG (T) => ATG (M)	1
	479	160	TCA (S) => TTA (L)	1		479	160	TCA (S) => TTA (L)	1		506	169	TCA (S) => TTA (L)	1		383	128	TCA (S) => TTA (L)	1		410	137	TCA (S) => TTA (L)	1
	695	232	TCG (S) => TTG (L)	1		695	232	TCG (S) => TTG (L)	1		722	241	TCG (S) => TTG (L)	1		599	200	TCG (S) => TTG (L)	1		626	209	TCG (S) => TTG (L)	1
	770	257	TCA (S) => TTA (L)	1		770	257	TCA (S) => TTA (L)	1		797	266	TCA (S) => TTA (L)	1		674	225	TCA (S) => TTA (L)	1		701	234	TCA (S) => TTA (L)	1
	974	325	TCA (S) => TTA (L)	1		974	325	TCA (S) => TTA (L)	1		1001	334	TCA (S) => TTA (L)	1		878	293	TCA (S) => TTA (L)	1		905	302	TCA (S) => TTA (L)	1
	983	328	CCT (P) => CTT (L)	1		983	328	CCT (P) => CTT (L)	1		1010	337	CCT (P) => CTT (L)	1		887	296	CCT (P) => CTT (L)	1		914	305	CCT (P) => CTT (L)	1
	1394	465	TCA (S) => TTA (L)	0.8		1394	465	TCA (S) => TTA (L)	0.8		1421	474	TCA (S) => TTA (L)	0.8		1298	433	TCA (S) => TTA (L)	0.8		1325	442	TCA (S) => TTA (L)	0.8
ndhF	259	87	CAC (H) => TAC (Y)	1	ndhF	236	79	GCT (A) => GTT (V)	0.8	ndhF	259	87	CAC (H) => TAC (Y)	1	ndhF	259	87	CAC (H) => TAC (Y)	1	ndhF	259	87	CAC (H) => TAC (Y)	1
	290	97	TCA (S) => TTA (L)	1							290	97	TCA (S) => TTA (L)	1		290	97	TCA (S) => TTA (L)	1		290	97	TCA (S) => TTA (L)	1
	586	196	CTT (L) => TTT (F)	0.8							586	196	CTT (L) => TTT (F)	0.8		586	196	CTT (L) => TTT (F)	0.8		586	196	CTT (L) => TTT (F)	0.8
	989	330	ACG (T) => ATG (M)	1							989	330	ACG (T) => ATG (M)	1		989	330	ACG (T) => ATG (M)	1		989	330	ACG (T) => ATG (M)	1
	1757	586	TCG (S) => TTG (L)	0.8							1739	580	TCG (S) => TTG (L)	0.8		1739	580	TCG (S) => TTG (L)	0.8		1757	586	TCG (S) => TTG (L)	0.8
	2135	712	GCC (A) => GTC (V)	1							2117	706	GCC (A) => GTC (V)	1		2117	706	GCC (A) => GTC (V)	1		1886	629	TCT (S) => TTT (F)	1
																					2135	712	GCC (A) => GTC (V)	1
																					2234	745	TCT (S) => TTT (F)	1
ndhG	166	56	CAT (H) => TAT (Y)	0.8	ndhG	166	56	CAT (H) => TAT (Y)	0.8	ndhG	166	56	CAT (H) => TAT (Y)	0.8	ndhG	166	56	CAT (H) => TAT (Y)	0.8	ndhG	166	56	CAT (H) => TAT (Y)	0.8
	314	105	ACA (T) => ATA (I)	0.8		314	105	ACA (T) => ATA (I)	0.8		314	105	ACA (T) => ATA (I)	0.8		314	105	ACA (T) => ATA (I)	0.8		314	105	ACA (T) => ATA (I)	0.8
	494	165	GCT (A) => GTT (V)	0.8		494	165	GCT (A) => GTT (V)	0.8		494	165	GCT (A) => GTT (V)	0.8		494	165	GCT (A) => GTT (V)	0.8		494	165	GCT (A) => GTT (V)	0.8
petB	418	140	CGG (R) => TGG (W)	1	petB	418	140	CGG (R) => TGG (W)	1	petB	418	140	CGG (R) => TGG (W)	1	petB	418	140	CGG (R) => TGG (W)	1	petB	418	140	CGG (R) => TGG (W)	1
	611	204	CCA (P) => CTA (L)	1		611	204	CCA (P) => CTA (L)	1		611	204	CCA (P) => CTA (L)	1		611	204	CCA (P) => CTA (L)	1		611	204	CCA (P) => CTA (L)	1
psaI	74	25	TCT (S) => TTT (F)	0.86	psaI	74	25	TCT (S) => TTT (F)	0.86	psaI	74	25	TCT (S) => TTT (F)	0.86	psaI	74	25	TCT (S) => TTT (F)	0.86	psaI	74	25	TCT (S) => TTT (F)	0.86
psbE	214	72	CCT (P) => TCT (S)	1	psbE	214	72	CCT (P) => TCT (S)	1	psbE	214	72	CCT (P) => TCT (S)	1	psbE	214	72	CCT (P) => TCT (S)	1	psbE	214	72	CCT (P) => TCT (S)	1
psbF	77	26	TCT (S) => TTT (F)	1	psbF	77	26	TCT (S) => TTT (F)	1	psbF	77	26	TCT (S) => TTT (F)	1	psbF	77	26	TCT (S) => TTT (F)	1	psbF	77	26	TCT (S) => TTT (F)	1
rpoA	830	277	TCA (S) => TTA (L)	1	rpoA	830	277	TCA (S) => TTA (L)	1	rpoA	830	277	TCA (S) => TTA (L)	1	rpoA	830	277	TCA (S) => TTA (L)	1	rpoA	830	277	TCA (S) => TTA (L)	1
rpoB	551	184	TCA (S) => TTA (L)	1	rpoB	338	113	TCT (S) => TTT (F)	1	rpoB	338	113	TCT (S) => TTT (F)	1	rpoB	338	113	TCT (S) => TTT (F)	1	rpoB	338	113	TCT (S) => TTT (F)	1
	566	189	TCG (S) => TTG (L)	1		551	184	TCA (S) => TTA (L)	1		551	184	TCA (S) => TTA (L)	1		551	184	TCA (S) => TTA (L)	1		551	184	TCA (S) => TTA (L)	1
	2009	670	TCT (S) => TTT (F)	1		566	189	TCG (S) => TTG (L)	1		566	189	TCG (S) => TTG (L)	1		566	189	TCG (S) => TTG (L)	1		566	189	TCG (S) => TTG (L)	1
	2435	812	TCA (S) => TTA (L)	0.86		2009	670	TCT (S) => TTT (F)	1		2009	670	TCT (S) => TTT (F)	1		2009	670	TCT (S) => TTT (F)	1		2009	670	TCT (S) => TTT (F)	1
						2435	812	TCA (S) => TTA (L)	0.86		2435	812	TCA (S) => TTA (L)	0.86		2435	812	TCA (S) => TTA (L)	0.86		2435	812	TCA (S) => TTA (L)	0.86
rpoC1	62	21	TCA (S) => TTA (L)	1	rpoC1	62	21	TCA (S) => TTA (L)	1	rpoC1	62	21	TCA (S) => TTA (L)	1	rpoC1	62	21	TCA (S) => TTA (L)	1	rpoC1	62	21	TCA (S) => TTA (L)	1
						278	93	TCT (S) => TTT (F)	1
rpoC2	109	37	CTT (L) => TTT (F)	1	rpoC2	2324	775	GCT (A) => GTT (V)	1	rpoC2	2324	775	GCT (A) => GTT (V)	1	rpoC2	2324	775	GCT (A) => GTT (V)	1	rpoC2	2324	775	GCT (A) => GTT (V)	1
	218	73	ACC (T) => ATC (I)	0.86		3062	1021	GCG (A) => GTG (V)	0.86		3062	1021	GCG (A) => GTG (V)	0.86		3062	1021	GCG (A) => GTG (V)	0.86		3062	1021	GCG (A) => GTG (V)	0.86
	563	188	ACC (T) => ATC (I)	1		3722	1241	TCA (S) => TTA (L)	0.86		3722	1241	TCA (S) => TTA (L)	0.86		3722	1241	TCA (S) => TTA (L)	0.86		3722	1241	TCA (S) => TTA (L)	0.86
	1169	390	TCC (S) => TTC (F)	0.86
	1273	425	CAT (H) => TAT (Y)	1
	1330	444	CTT (L) => TTT (F)	1
	1462	488	CGG (R) => TGG (W)	1
	2477	826	CCT (P) => CTT (L)	0.86
	2732	911	ACT (T) => ATT (I)	0.86
	3347	1116	TCG (S) => TTG (L)	0.86
	3557	1186	CCC (P) => CTC (L)	0.86
	3797	1266	ACT (T) => ATT (I)	1
	3808	1270	CCA (P) => TCA (S)	1
rps2	248	83	TCA (S) => TTA (L)	1	rps2	248	83	TCA (S) => TTA (L)	1	rps2	248	83	TCA (S) => TTA (L)	1	rps2	248	83	TCA (S) => TTA (L)	1	rps2	248	83	TCA (S) => TTA (L)	1
rps14	80	27	CCC (P) => CTC (L)	1	rps14	80	27	CCC (P) => CTC (L)	1	rps14	80	27	CCC (P) => CTC (L)	1	rps14	80	27	CCC (P) => CTC (L)	1	rps14	80	27	CCC (P) => CTC (L)	1
	149	50	CCA (P) => CTA (L)	1		149	50	CCA (P) => CTA (L)	1		149	50	CCA (P) => CTA (L)	1		149	50	CCA (P) => CTA (L)	1		149	50	CCA (P) => CTA (L)	1
rps16	107	36	TCA (S) => TTA (L)	0.83	rps16	107	36	TCA (S) => TTA (L)	0.83	rps16	497	166	TCA (S) => TTA (L)	0.83	rps16	107	36	TCA (S) => TTA (L)	0.83	rps16	107	36	TCA (S) => TTA (L)	0.83
